# Supplementary material for: A new 2D Cu-MOF constructed from carboxylate ligands containing C–H⋯π interactions as a recyclable responsive luminescent sensor for VOCs
Source: Royal Society of Chemistry journal article supplement (doi:10.1039/d0dt04363j), 2021-01-01
Supplement: d0dt04363j1.pdf [file d0dt04363j1.pdf]

## Supporting Information

### **New 2D Cu-MOF Constructed from Carboxylate Ligand Containing C-H $\cdots$ $\pi$ Interaction as a Recyclable Responsive Luminescent Sensor for VOCs Vapors**

*Chengxin Liu,<sup>a</sup> Jin Cui,<sup>\*b</sup> Yufang Wang<sup>c</sup> and Mingjie Zhang<sup>\*a</sup>*

*a. Department of Chemistry, School of Sciences, Tianjin University, Tianjin 30035, P. R. of China.*

*b. National Foodstuff Inspection Center, Tianjin Product Quality Inspection Technology Research Institute, Tianjin 300384, P. R. of China.*

*c. Scientific Research Department, Shijiazhuang University of Applied Technology, Shijiazhuang 050081, P. R. of China.*

## General Considerations

Unless otherwise noted, all reactions were performed with oven-dried glassware with chemicals or reagents obtained from commercial sources. Solvents were dried over 4-8 Å mesh molecular sieves (Aldrich). Reactions were monitored by thin layer chromatography on 0.20 mm Anhui Liangchen silica gel plates and spots were detected with UV light. Silica gel (200-300 mesh) (from Qingdao ocean Chemical Plant) was used for flash chromatography. NMR data were collected on a Bruker AVANCE III HD 400-MHz NMR Spectrometer. Infrared spectroscopy was recorded with an ALPHA spectrophotometer at room temperature. Elemental analyses were determined in house using an elemental vario el III elemental analyzer. Thermal analyses were performed in nitrogen in the temperature range 25–800 °C with a heating rate of 10 °C min<sup>-1</sup> on a Netzsch TG 209 F3 instrument. Powder X-ray diffraction patterns were obtained on a D/MAX-2500 of Rigaku Corporation Powder Diffractometer at a scan rate of 5°/min<sup>-1</sup>. Fluorescence spectra, the fluorescence absolute quantum yields ( $\Phi_{\text{fl}}$ ) and time-resolved fluorescence measurements were recorded on a Fluorolog-3 of HORIBA Jobin Yvon spectrofluorometer. The images of compound **6**, Cu-MOF and activated Cu-MOF were taken under the Leica-DMI1 inverted biological microscope. The dynamic vapor adsorption was tested in dynamic vapor adsorption apparatus of TA-Instrument-VTI-SA+. Surface area and pore size distribution measurements were measured using a Micromeritics ASAP 2020 surface area and pore size analyzer. Before the measurements, activated Cu-MOF (100 mg) was degassed under reduced pressure at 100 °C for 10 h. Pore size distribution data were calculated from the N<sub>2</sub> sorption isotherms at 77 K based on non-local density functional theory (NLDT) model in the Micromeritics ASAP2020 software package (assuming slit pore geometry). The data of X-ray crystallography was collected on a XtaLAB mini (600W, SHINE, CCD, 75mm, 0.1 electrons/pixel/sec) X-ray single crystal diffractometer. The structure was solved and refined by direct methods using the SHELXS 97 program.<sup>1,2</sup> The non-hydrogen atoms were refined using anisotropic thermal parameters. All the hydrogen atoms were located at geometrically calculated positions.

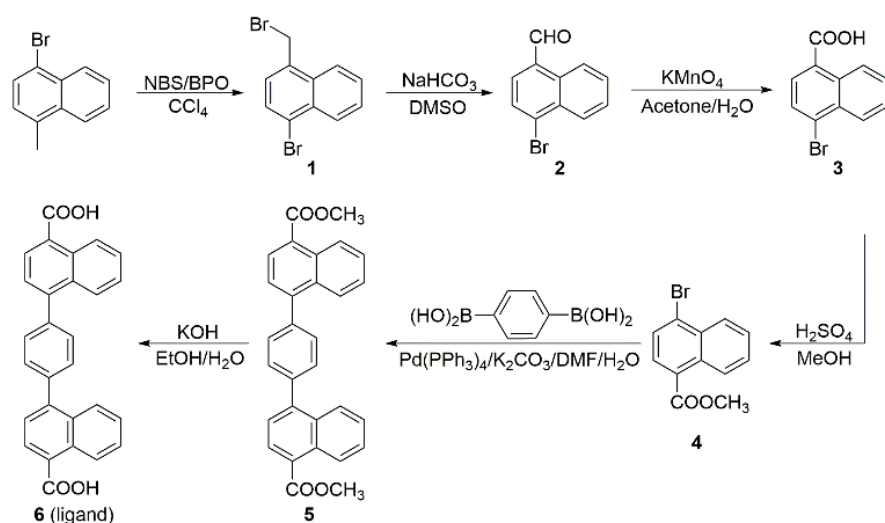

Figure S1. Synthesis of ligand (compound **6**).

The ligand was synthesized in good yields using 1-bromo-4-methylnaphthalene as the starting material. 1-Bromo-4-methylnaphthalene was treated with N-bromosuccinimide and dibenzoyl peroxide with CCl<sub>4</sub> as solvent to obtain compound **1**. Compound **1** was heated with NaHCO<sub>3</sub> in DMSO to give compound **2** as yellow solid. Then compound **2** was refluxed in acetone and oxidized by KMnO<sub>4</sub> to give compound **3**, which was subsequently refluxed with sulfuric acid in MeOH to obtain compound **4**. Refluxing of compound **4** with 1,4-Phenylenebisboronic acid, tetrakis-(triphenylphosphine)-palladium and K<sub>2</sub>CO<sub>3</sub> in DMF and H<sub>2</sub>O gave compound **5**, which then refluxed with 10% NaOH and ethyl alcohol generated compound **6**.

#### **Synthesis of 1-bromo-4-(bromomethyl)naphthalene (compound 1) <sup>3</sup>**

A 500 mL Schlenk flask was added 1-bromo-4-methylnaphthalene (10 g, 48 mmol, 1 eq), N-bromosuccinimide (9.4 g, 53 mmol, 1.1 eq), dibenzoyl peroxide (1 g, 4 mmol, 0.083 eq) and CCl<sub>4</sub> (150 mL). After refluxed for 5 h under N<sub>2</sub> atmosphere, the mixture was cooled to room temperature and filtered, the white precipitate was washed by CCl<sub>4</sub> (100 mL) for three times. Then the resulting filtrate was washed by saturated sodium sulfite solution (200 mL), dried over anhydrous sodium sulfate, and achieved by flash chromatography on a silica gel column (ether/petroleum). The resulting white solid product was dried in vacuum at room temperature. Yield: 71 %. <sup>1</sup>H NMR (400 MHz, Chloroform-d)  $\delta$  8.21 (d, *J* = 7.9 Hz, 1H), 8.04 (d, *J* = 8.0 Hz, 1H), 7.61 (d, *J* = 7.6 Hz, 1H), 7.55 (t, *J* = 7.5 Hz, 2H), 7.26 (d, *J* = 7.6 Hz, 1H), 4.80 (s, 2H). <sup>13</sup>C NMR (100 MHz, Chloroform-d)  $\delta$  133.36, 132.45, 132.14, 129.55, 128.15, 127.91, 127.67, 127.43, 124.59, 124.27, 30.99.

#### **Synthesis of 4-bromo-1-naphthaldehyde (compound 2) <sup>3</sup>**

A 250 mL flask was charged with compound **1** (4.5 g, 15 mmol, 1 eq), NaHCO<sub>3</sub> (2.5 g, 30 mmol, 2 eq) and DMSO (50 mL). The mixture was heated to 95°C for 5 h. After cooling to room temperature, ice water (100 mL) was added. The mixture was extracted with ethyl acetate (3 x 100 mL). Further purification of the resulting yellow solid product was achieved by flash chromatography (10 % ethyl acetate in ether/petroleum). Yield: 62 %. <sup>1</sup>H NMR (400 MHz, Chloroform-d)  $\delta$  10.34 (s, 1H), 9.26 (d, *J* = 8.3 Hz, 1H), 8.34 (d, *J* = 7.9 Hz, 1H), 7.94 (d, *J* = 7.7 Hz, 1H), 7.77 (d, *J* = 7.7 Hz, 1H), 7.75–7.63 (m, 2H). <sup>13</sup>C NMR (100 MHz, Chloroform-d)  $\delta$  192.63, 136.13, 132.14, 131.43, 131.34, 130.9, 129.81, 129.36, 128.30, 127.74, 125.14.

#### **Synthesis of 4-Bromo-1-naphthalenecarboxylic acid (compound 3) <sup>3</sup>**

Compound **2** (5 g, 21 mmol, 1 eq) and acetone (50 mL) was refluxed in a 250 mL round bottom flask equipped with a stir bar. KMnO<sub>4</sub> (6 g, 38 mmol, 1.8 eq) in water (100 mL) was added dropwise to the boiling mixture for 3 h and continued refluxed for 2 h. Then the mixture was filtered at a high temperature. The black precipitate was washed by acetone (50 mL) and water (50 mL). The acetone was removed in vacuum and the water solution was washed by saturated sodium sulfite solution (50 mL) and diethyl ether (50 mL). The colorless transparent solution was cooled to 0°C and adjusted to pH 1.0 with 1 M HCl, the resulting white precipitate was collected by filtration, washed by hot water and dried in vacuum at 110 °C. Yield: 85 %. <sup>1</sup>H NMR (400 MHz, DMSO-d<sub>6</sub>)  $\delta$  13.47 (s, 1H), 9.02–8.86 (m, 1H), 8.27 (dd, *J* = 7.4, 2.7 Hz, 1H), 8.10–7.94 (m, 2H), 7.77 (dd,

$J = 6.6, 3.3$  Hz, 2H).  $^{13}\text{C}$  NMR (100 MHz, DMSO- $d_6$ )  $\delta$  168.53, 132.24, 131.81, 130.49, 129.85, 128.96, 128.72, 128.55, 127.48, 127.41, 126.71.

#### **Synthesis of methyl 4-bromo-1-naphthoate (compound 4)**

Compound **3** (3 g, 12 mmol) was dissolved in a mixed solution of MeOH (90 mL) and concentrated sulfuric acid (3 mL) refluxed for 12 h in a 250 mL round bottom flask. After cooling to room temperature, the mixture was concentrated in vacuum and extracted with  $\text{CH}_2\text{Cl}_2$  (3 x 30 mL). The organic layer was dried over  $\text{Na}_2\text{SO}_4$ , filtered and concentrated in vacuo to give the resulting product pale yellow oil. Yield: 92 %.  $^1\text{H}$  NMR (400 MHz, Chloroform- $d$ )  $\delta$  8.91–8.81 (m, 1H), 8.28–8.19 (m, 1H), 7.89 (d,  $J = 7.9$  Hz, 1H), 7.72 (d,  $J = 7.9$  Hz, 1H), 7.56 (td,  $J = 7.5, 6.3, 4.2$  Hz, 2H), 3.91 (s, 3H).  $^{13}\text{C}$  NMR (100 MHz, Chloroform- $d$ )  $\delta$  167.45, 132.40, 132.19, 130.11, 128.91, 128.82, 128.50, 127.71, 127.63, 126.99, 126.26, 52.37.

#### **Synthesis of 1,4-bis(methyl 1-naphthoate)benzene (compound 5)**

Under  $\text{N}_2$  atmosphere, a 250 mL flask was charged with compound **4** (3 g, 12 mmol, 2.2 eq), 1,4-Phenylenebisboronic acid (0.9 g, 5.4 mmol, 1 eq),  $\text{K}_2\text{CO}_3$  (1.1 g, 8.1 mmol, 1.5 eq), tetrakis-(triphenylphosphine)-palladium (0.6 g, 0.8 mmol, 0.1 eq), DMF (60 mL) and  $\text{H}_2\text{O}$  (15 mL). The mixture was heated to  $65^\circ\text{C}$  for 24 h. After cooling to room temperature, quantity of water was added. The mixture was filtrated and the filtrate was extracted with  $\text{CH}_2\text{Cl}_2$  (3 x 80 mL). Further purification of the resulting white oil product was achieved by flash chromatography on a silica gel column (10 % ethyl acetate in aether petrolei). Yield: 69 %.  $^1\text{H}$  NMR (400 MHz, Chloroform- $d$ )  $\delta$  9.02 (d,  $J = 8.6$  Hz, 1H), 8.27 (d,  $J = 7.5$  Hz, 1H), 8.08 (d,  $J = 8.5$  Hz, 1H), 7.69–7.64 (m, 1H), 7.63 (s, 2H), 7.56 (d,  $J = 7.4$  Hz, 2H).  $^{13}\text{C}$  NMR (100 MHz, Chloroform- $d$ )  $\delta$  168.04, 144.87, 139.69, 132.08, 131.82, 129.94, 129.63, 127.64, 126.75, 126.66, 126.42, 126.13, 125.84, 52.28.

#### **Synthesis of 1,4-bis(4-naphthoic acid)benzene (ligand, complex 6)**

A suspension of compound **5** (2.5 g, 5.6 mmol) in 10% NaOH (40 mL) and ethyl alcohol (120 mL) was refluxed for 5 h in a 500 mL round bottom flask equipped with a stir bar. After cooling to room temperature, the mixture was concentrated in vacuum and acidized with 1 M HCl, white precipitate was collected by filtration, washed by hot water and dried in vacuum at  $110^\circ\text{C}$ . Yield: 91 %.  $^1\text{H}$  NMR (400 MHz, DMSO- $d_6$ )  $\delta$  13.27 (s, 1H), 9.02 (d,  $J = 8.6$  Hz, 1H), 8.26 (d,  $J = 7.4$  Hz, 1H), 8.04 (d,  $J = 8.5$  Hz, 1H), 7.76–7.70 (m, 1H), 7.69 (s, 2H), 7.64 (t,  $J = 8.0$  Hz, 2H).  $^{13}\text{C}$  NMR (101 MHz, DMSO- $d_6$ )  $\delta$  169.10, 144.09, 139.50, 131.78, 131.66, 130.36, 129.77, 128.03, 127.94, 127.13, 126.61, 126.56, 126.45. FT-IR ( $\text{cm}^{-1}$ ): 391 (w), 541 (w), 518 (w), 649 (w), 650 (w), 671 (w), 770 (m), 795 (w), 843 (w), 923 (w), 999 (w), 1105 (w), 1160 (w), 1189 (w), 1245 (m), 1271 (m), 1309 (w), 1325 (w), 1383 (w), 1430 (w), 1453 (w), 1504 (w), 1582(m), 1683(s), 2554 (w), 2664 (w), 2990 (m), 3424 (w). Elemental analysis (% calc/found: C 78.52/80.37, H 4.26/4.34).

#### **Preparation of Cu-MOF**

Compound **6** (21 mg, 0.05 mmol), TEA (14  $\mu\text{L}$ ) and DMF (2 mL) were stirred for 0.5 h in a 10 mL vial, then,  $\text{Cu}(\text{NO}_3)_2 \cdot 3\text{H}_2\text{O}$  (72 mg, 0.3 mmol) was added. The vial was tightly capped, placed in an oven and heated to  $110^\circ\text{C}$  in 4 h, held for 72 h, and then cooled to  $25^\circ\text{C}$  in 42.5 h to give 8 mg Cu-MOF as green transparent olivary crystal. Or,

compound **6** (21 mg, 0.05 mmol), HCl (5  $\mu$ L) and DMF (2 mL) were stirred for 10 min in a 10 mL vial, then, Cu(NO<sub>3</sub>)<sub>2</sub>•3H<sub>2</sub>O (72mg, 0.3 mmol) was added. The vial was tightly capped and placed in the same conditions to yield 8 mg of Cu-MOF as green transparent cuboid crystal. These two differently shaped crystals have the same unit cell parameters. FT-IR (cm<sup>-1</sup>): 384 (w), 472 (w), 557 (w), 584 (w), 654 (w), 665 (w), 770 (m), 795 (w), 858 (w), 925 (w), 1001 (w), 1067 (w), 1089 (w), 1155 (w), 1245 (w), 1371 (m), 1391 (m), 1453 (w), 1505 (w), 1584 (w), 1606 (m), 1672 (m), 2334 (vw), 2357 (vw), 2839 (vw), 2951 (w). Elemental analysis (% calc/found: C 64.49/65.22, H 5.20/4.83, N 4.81/4.47).

#### Preparation of activated Cu-MOF

The obtained crystals of Cu-MOF were soaked in MeOH for 3 days at room temperature. The supernatant was decanted and fresh MeOH was added every day. Then the crystals were treated with CH<sub>2</sub>Cl<sub>2</sub> for another 3 days similarly. After that, the mixture was filtered and the resulting green precipitate was heated in vacuum at 80°C for 3 h to remove the residual reagents in the pores. FT-IR (cm<sup>-1</sup>): 391 (w), 480 (w), 584 (w), 669 (w), 770 (m), 795 (w), 843 (w), 850 (w), 925 (w), 1020 (w), 1040 (w), 1130 (w), 1158 (w), 1245 (w), 1370 (m), 1391 (m), 1453 (w), 1504 (w), 1582 (w), 1660 (m), 1672 (w), 2909 (w), 3018 (w), 3424 (m). Elemental analysis (% calc/found: C 68.49/70.07, H 3.57/3.36).

#### Preparation of activated Cu-MOF $\supset$ guests

A 1.5 mL vial was charged with 15 mg activated Cu-MOF which had heated to 100°C in vacuum for 8 h. The vial was then placed into a 15 mL sealed container, which contains 3 mL testing solvent, for 48 h in 40°C. Subsequently the vial was taken out of the container and the emission spectra of activated Cu-MOF $\supset$ guests was taken.

#### Figures

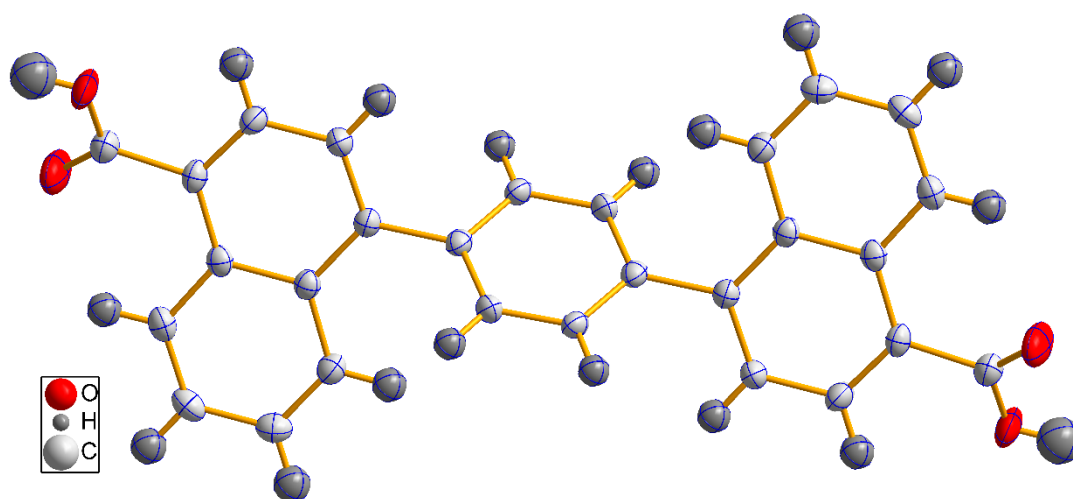

Figure S2. Structure of crystallographically independent molecules of ligand, the solvent molecules have been removed for clarity.

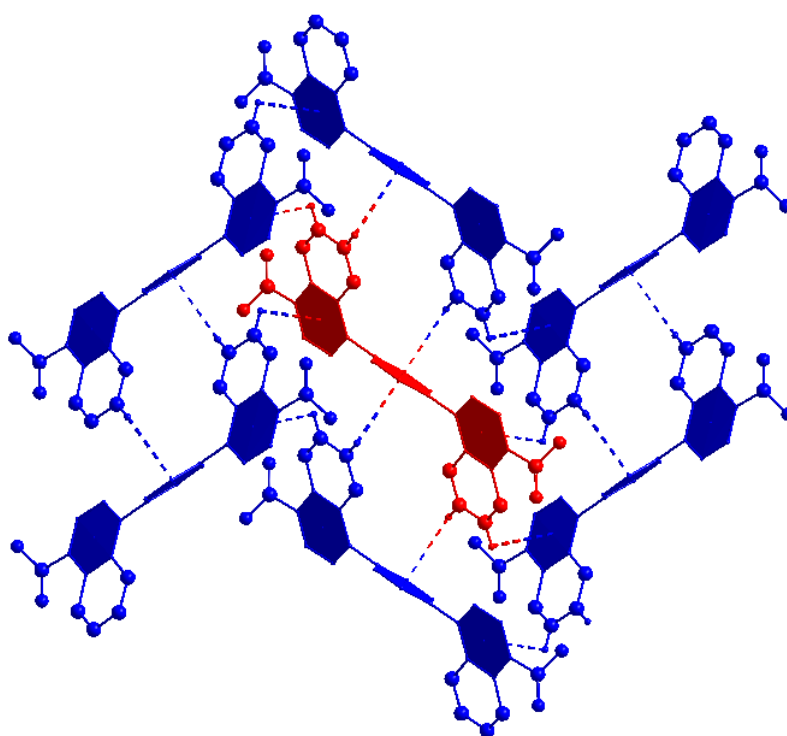

Figure S3. C–H $\cdots\pi$  interactions in a single ligand crystal, represented as dotted lines, measured between H and the adjacent phenyl ring centroids.

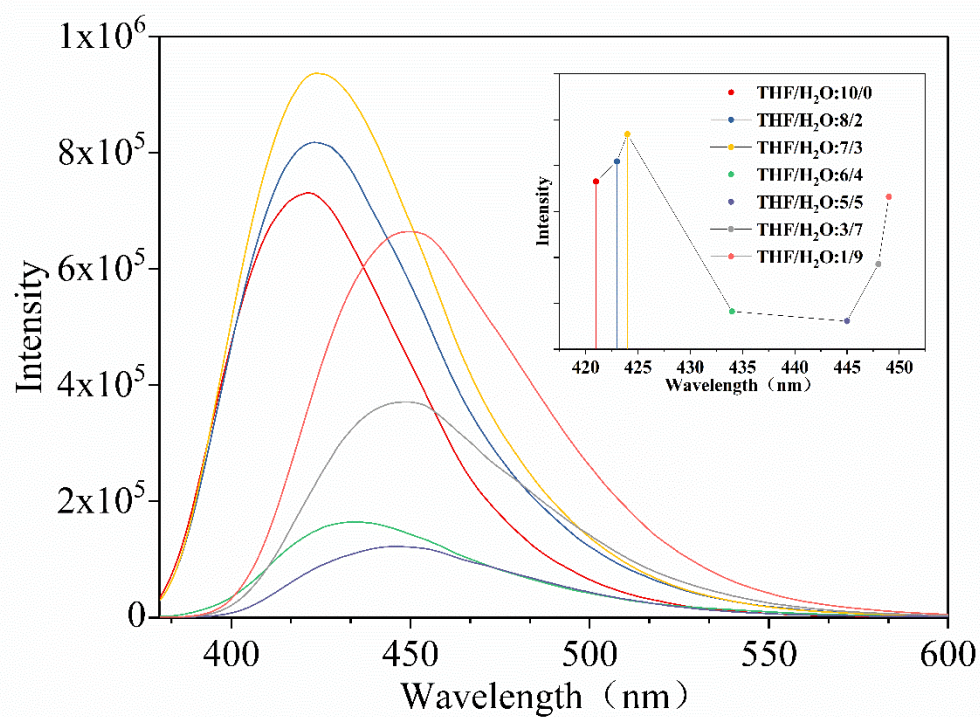

Figure S4. Fluorescence emission spectrum of the ligand in the THF/H<sub>2</sub>O mixed solvent at various volume ratios. The inset: diagram of the changes in the intensity of fluorescence as a function of maximum emission.

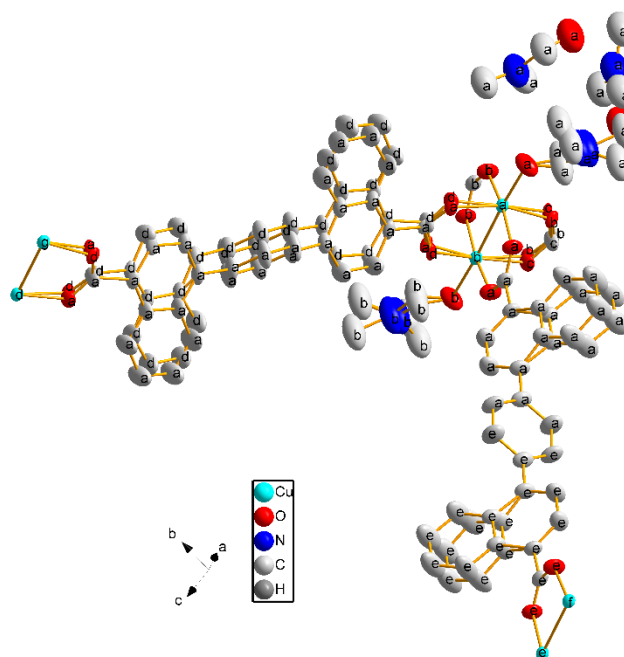

Figure S5. Unit-cell content of the crystal structure of Cu-MOF. Hydrogen atoms have been removed for clarity. Here,  $a = x, y, z$ ;  $b = 1-x, 1-y, -z$ ;  $c = x, -1+y, -1+z$ ;  $d = 1-x, 2-y, 1-z$ ;  $e = 2-x, -y, 1-z$ ;  $f = 2-x, -y, 1-z$ ;  $g = x, 1+y, 1+z$ .

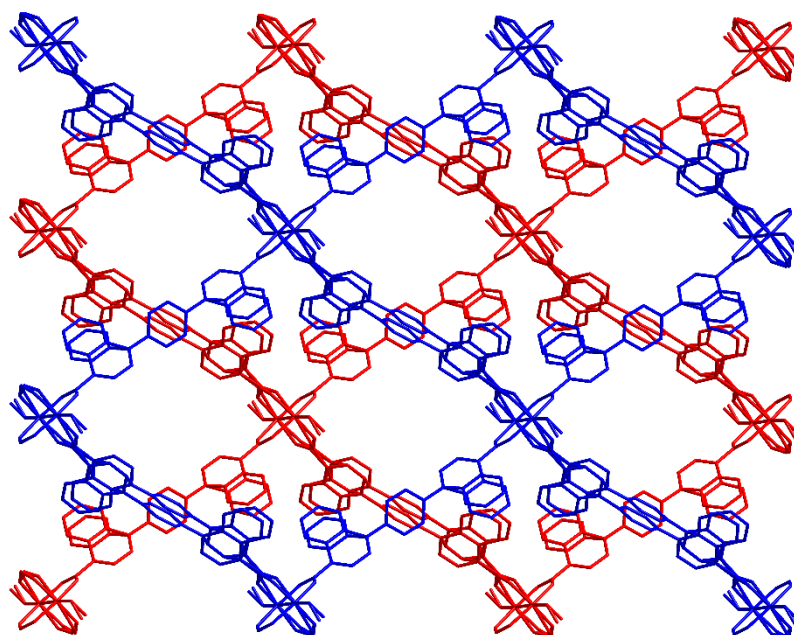

Figure S6. The crystal structure of Cu-MOF viewed along the  $[100]$  direction. Here, red and blue represent two neighboring layers. The solvent molecules have been removed for clarity.



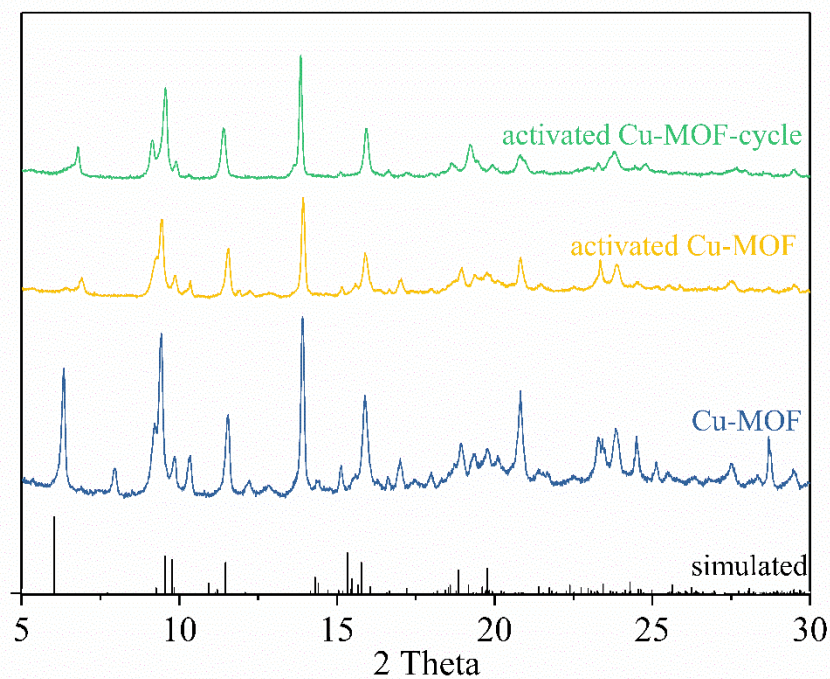

Figure S7. Simulated PXRD of Cu-MOF and measured PXRD of Cu-MOF, activated Cu-MOF and the activated Cu-MOF after cycle experiment.

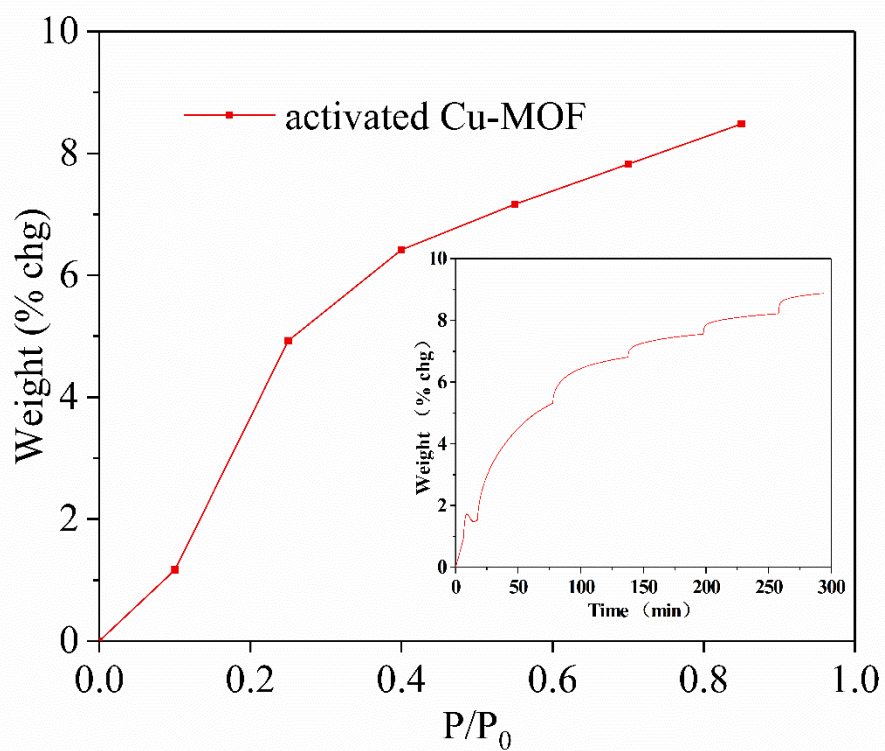

Figure S8. Dynamic vapor adsorption (VTI) of the activated Cu-MOF using benzene at room temperature. The inset: the weight changes as a function of time.



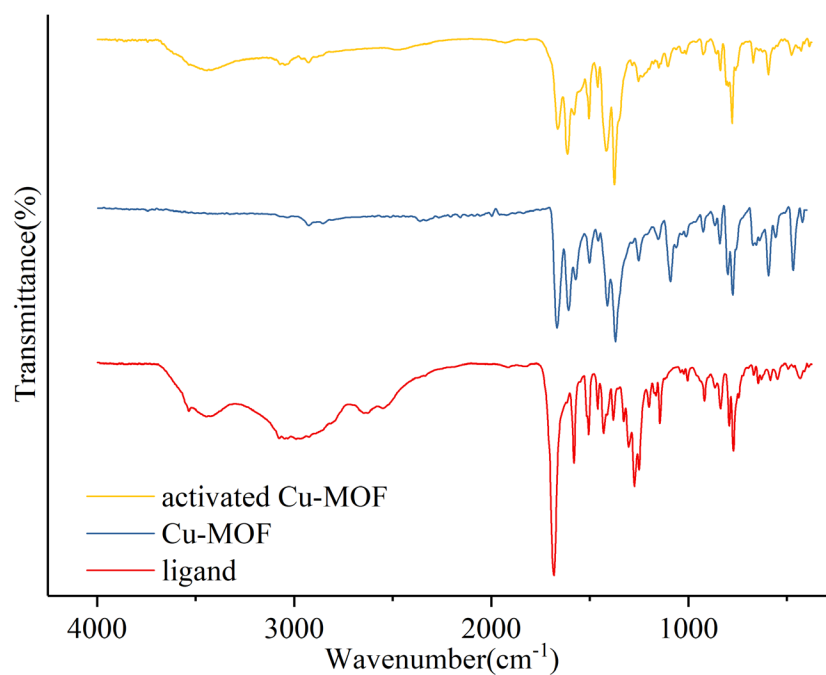

Figure S9. FT-IR spectra of ligand, Cu-MOF and activated Cu-MOF.

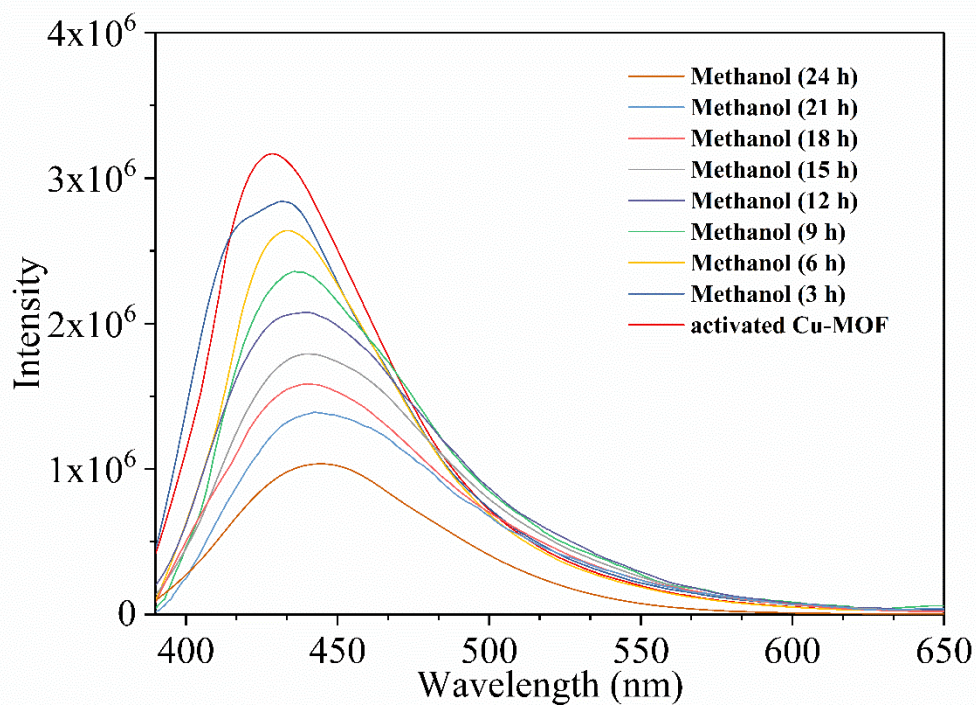

Figure S10. Changes in the intensity and emission spectrum of fluorescence with activated Cu-MOF exposed to methanol vapor.

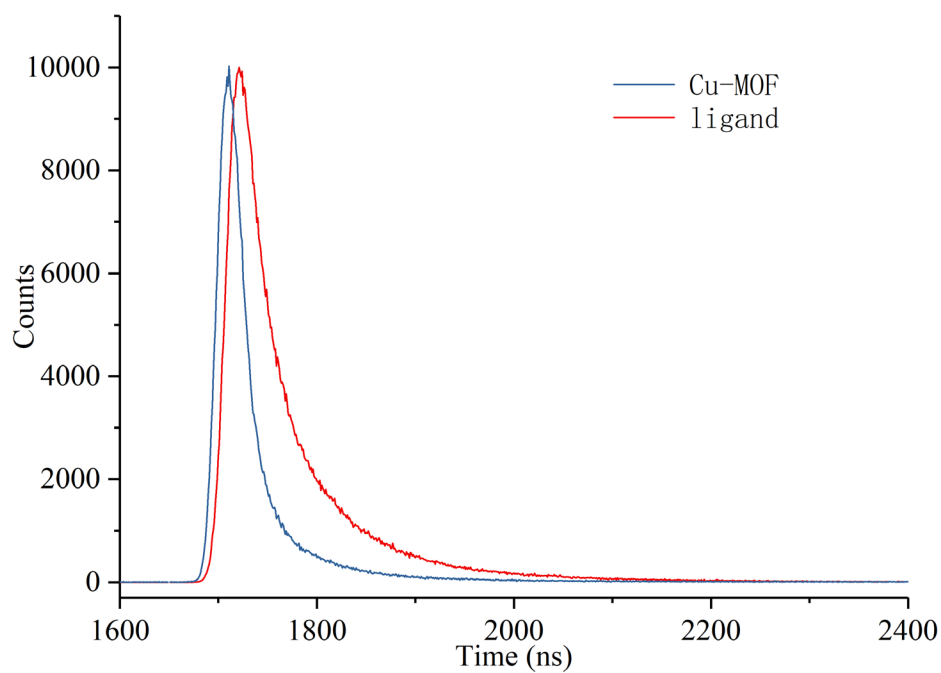

Figure S11. The fluorescence decay lifetime of ligand and Cu-MOF.

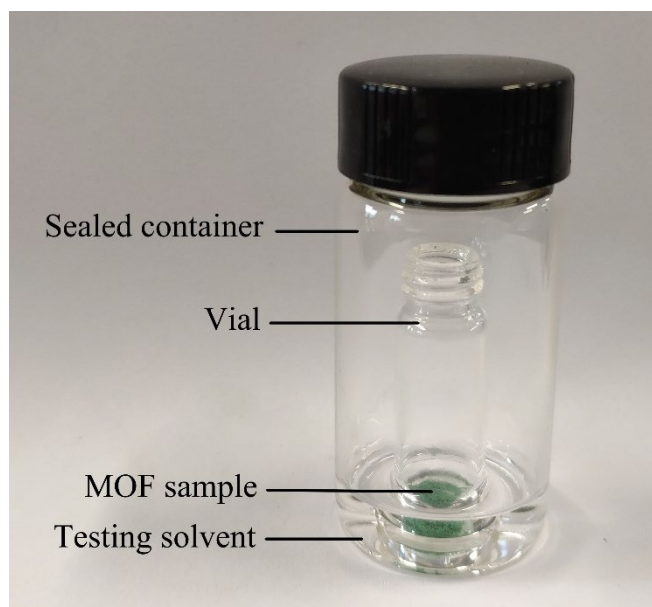

Figure S12. Diagram of the experimental setup for incubating activated Cu-MOF under different VOCs vapors.

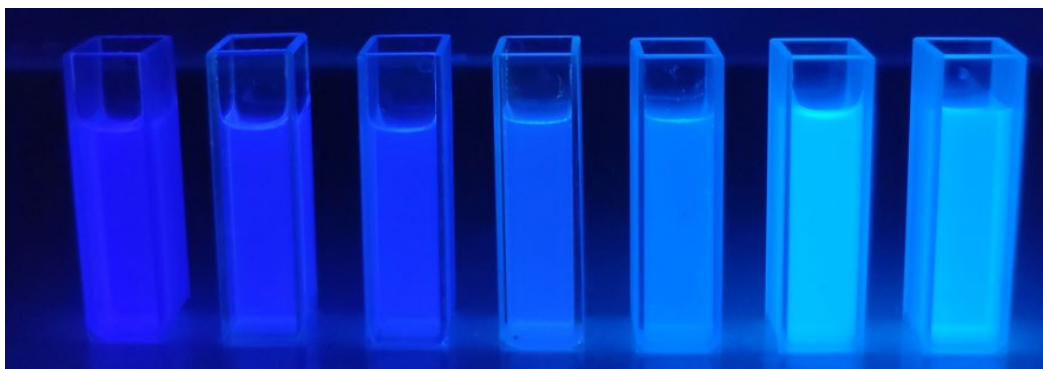

Figure S13. Fluorescent images of ligand in THF/H<sub>2</sub>O mixed solvents with different volume ratios.

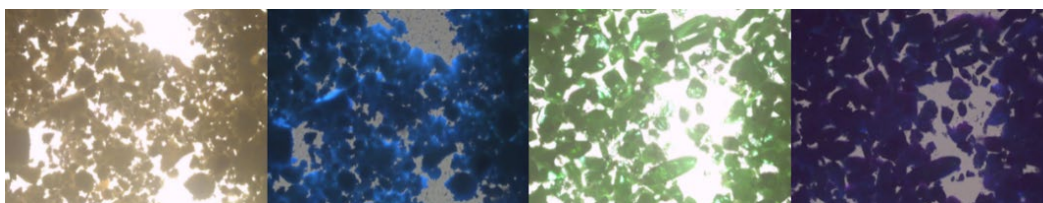

Figure S14. From left to right: under optical images of ligand, under fluorescent images of ligand, under optical images of Cu-MOF, under fluorescent images of Cu-MOF.

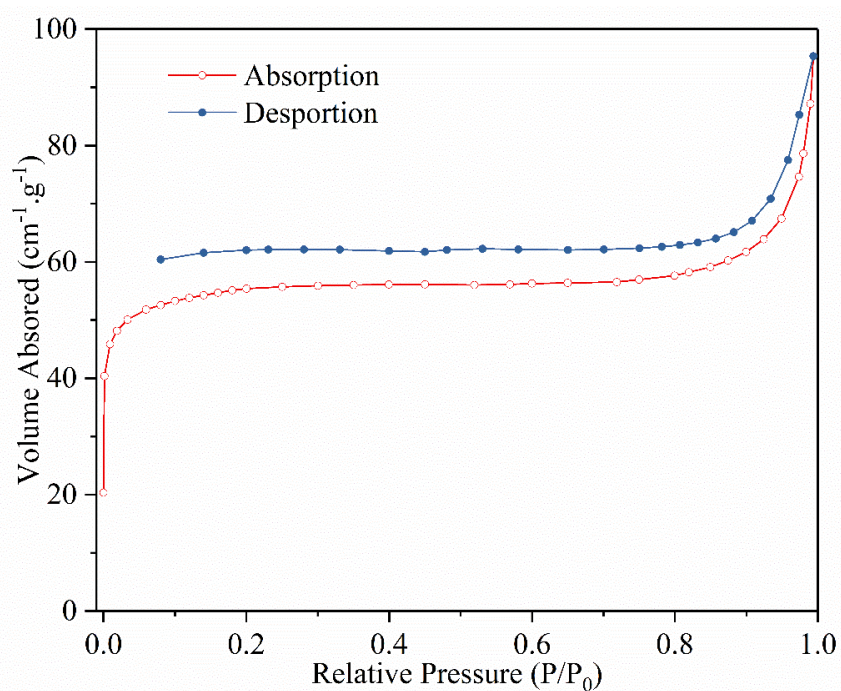

Figure S15. Nitrogen adsorption–desorption isotherm of activated Cu-MOF after the cyclic experiments.

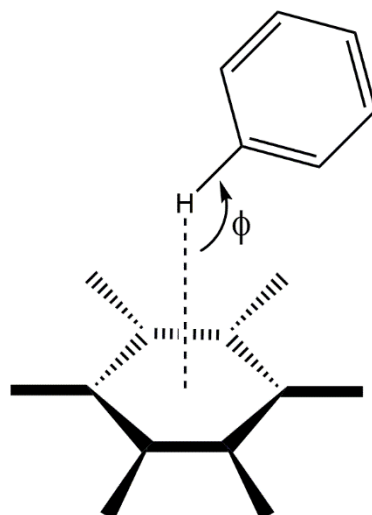

Figure S16. Orientation dependence of the C-H $\cdots$  $\pi$  interactions.

Table S1. The distance (Å) and angle  $\phi$  (°) of C-H $\cdots$  $\pi$  interactions in Cu-MOF.

| Entry | Bond                 | Distance   | Angle        |
|-------|----------------------|------------|--------------|
| I a   | C28-H $\cdots$ $\pi$ | 3.1731(7)  | 142.265(712) |
| I b   | C31-H $\cdots$ $\pi$ | 2.9133(6)  | 153.744(698) |
| II a  | C39-H $\cdots$ $\pi$ | 3.3278(9)  | 148.503(863) |
| II b  | C22-H $\cdots$ $\pi$ | 2.8168(7)  | 131.870(901) |
| III a | C6-H $\cdots$ $\pi$  | 3.2883(11) | 139.609(923) |
| III b | C6A-H $\cdots$ $\pi$ | 3.1798(13) | 124.347(891) |

### NMR spectroscopy

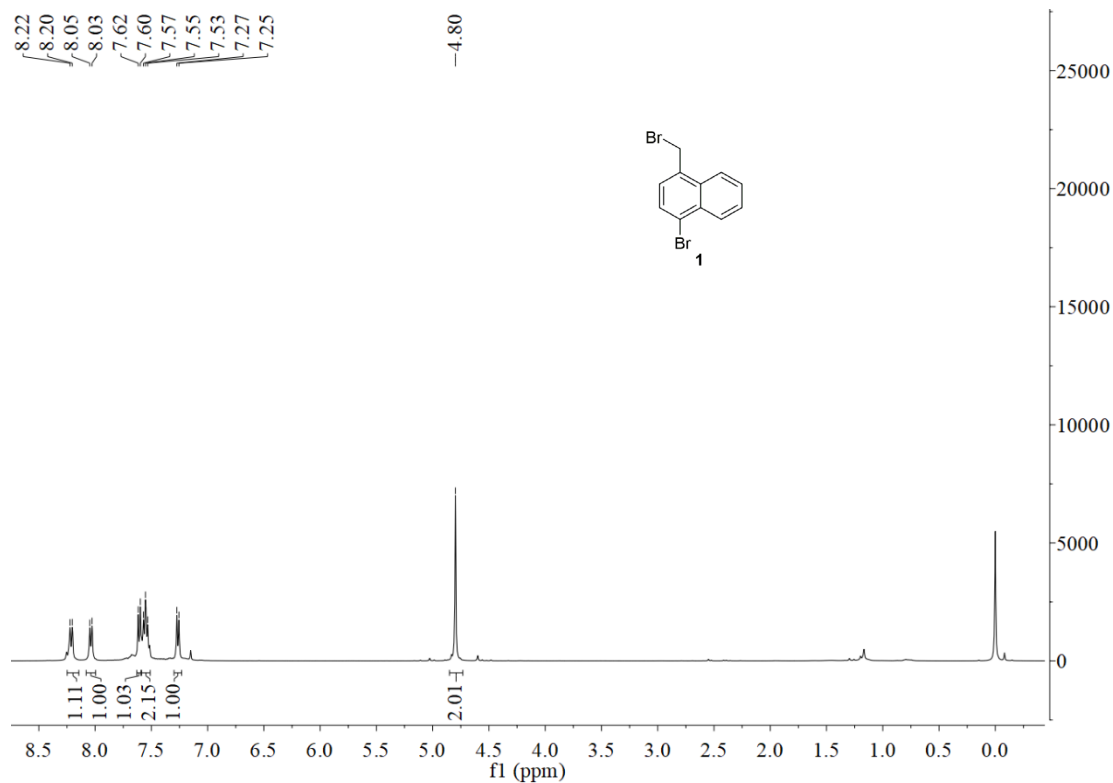

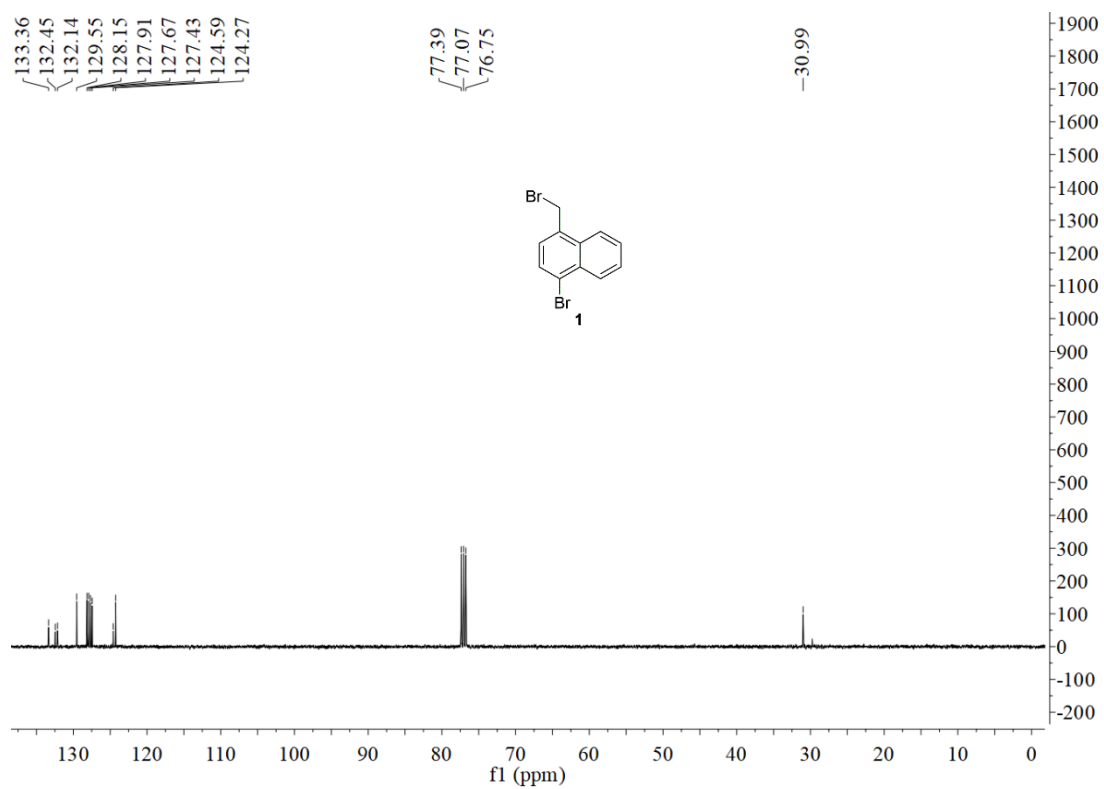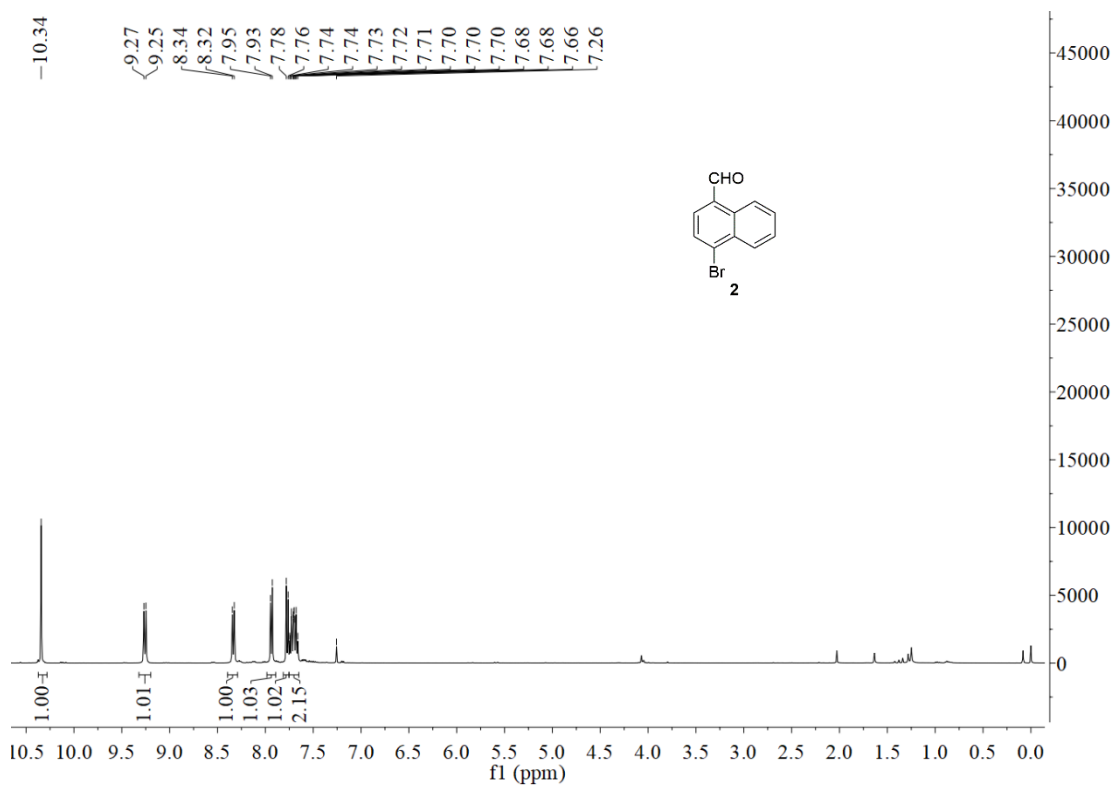

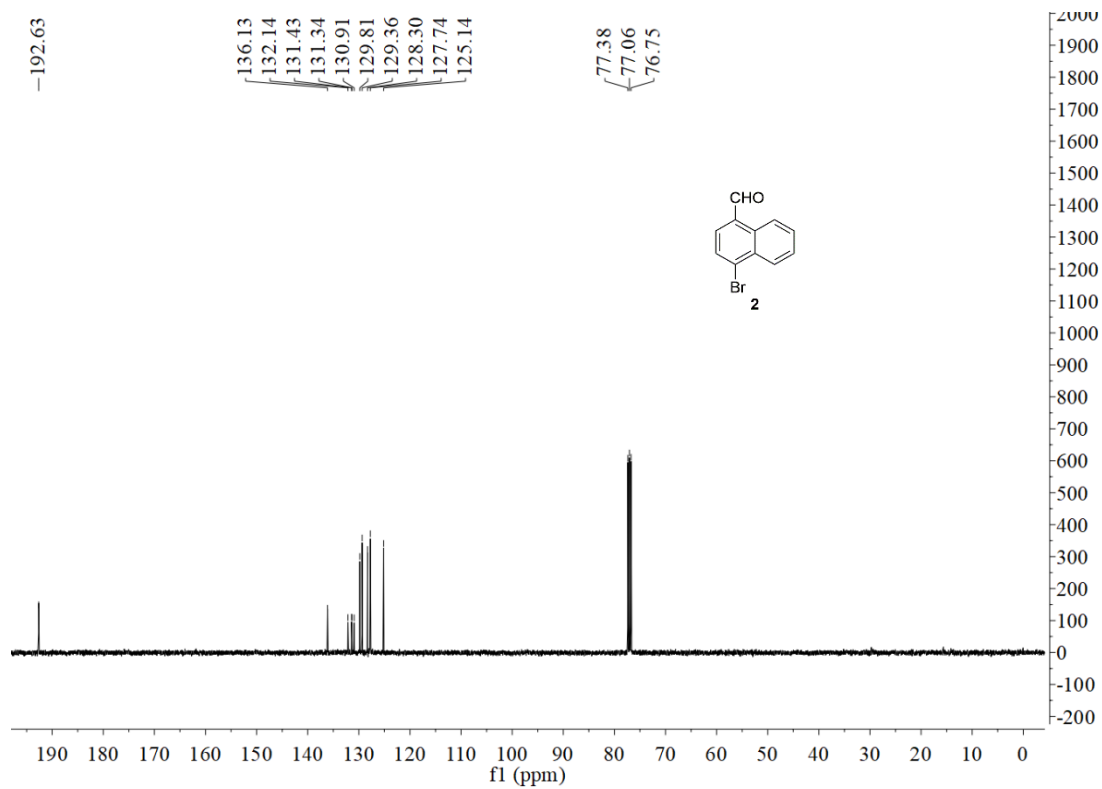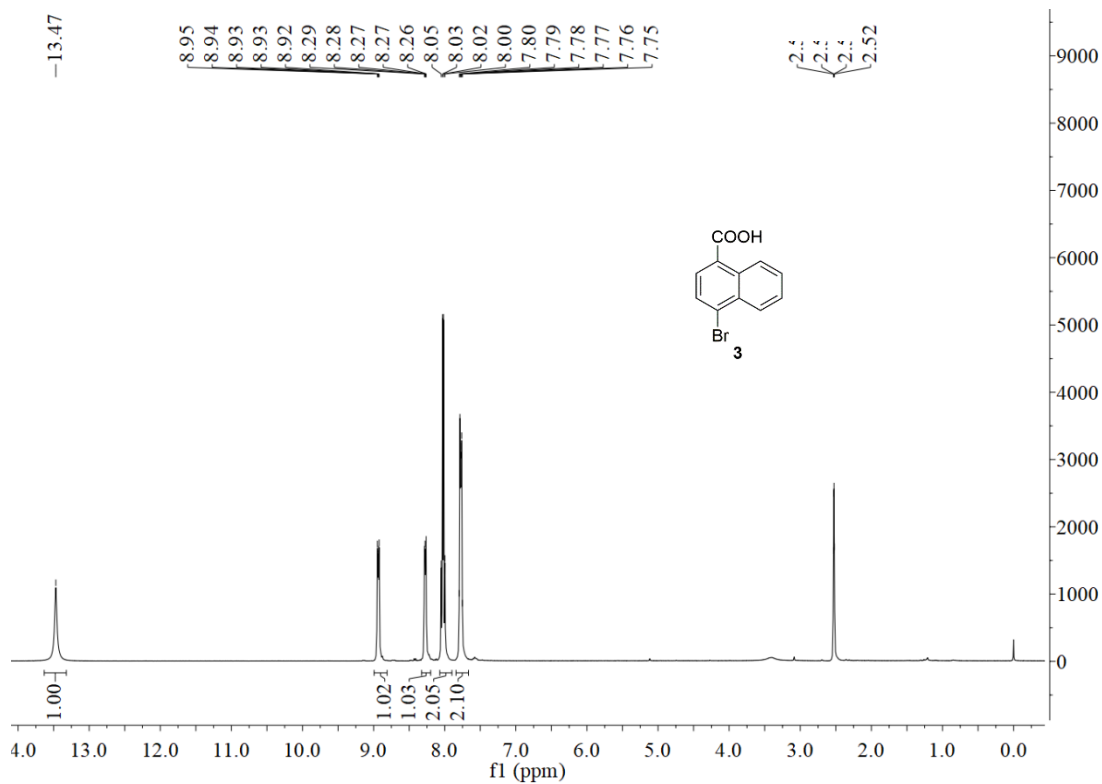



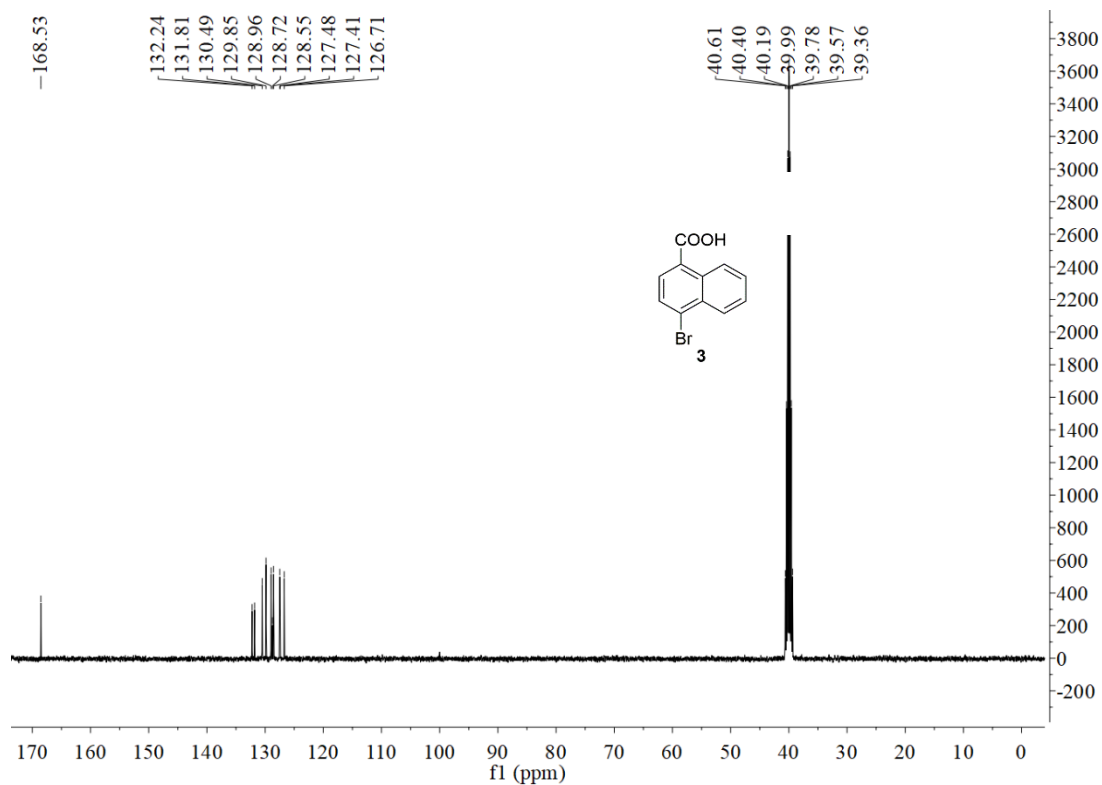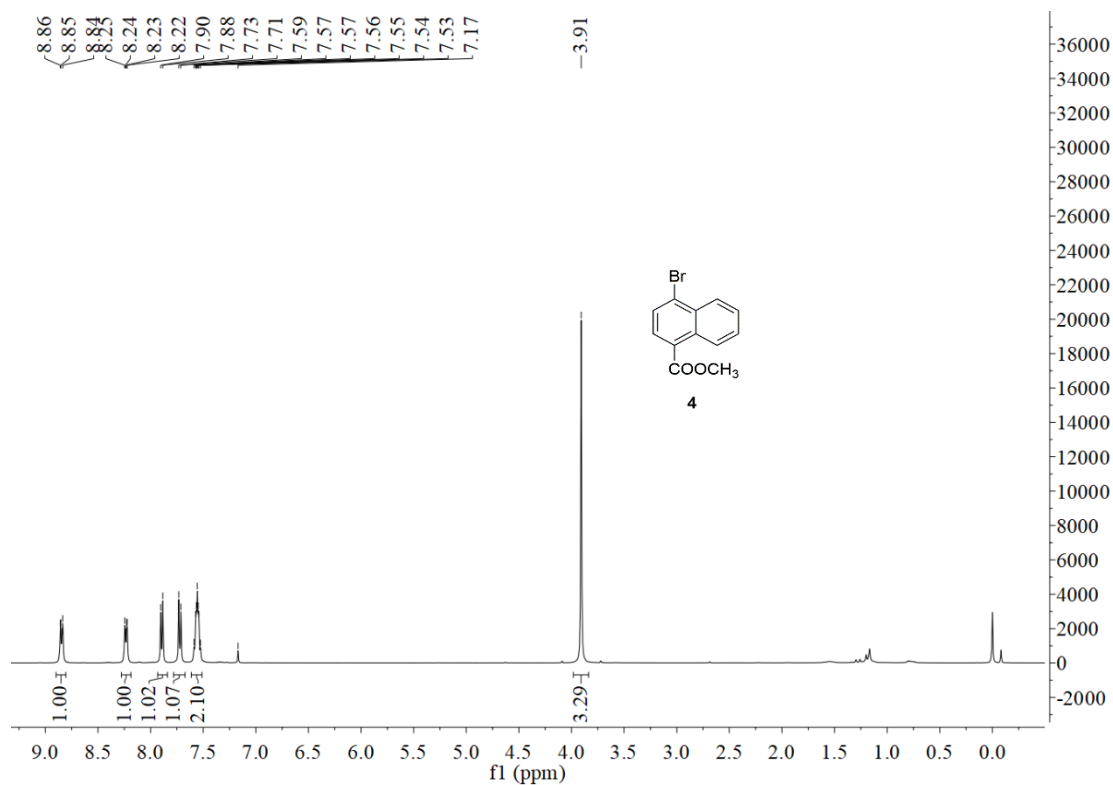

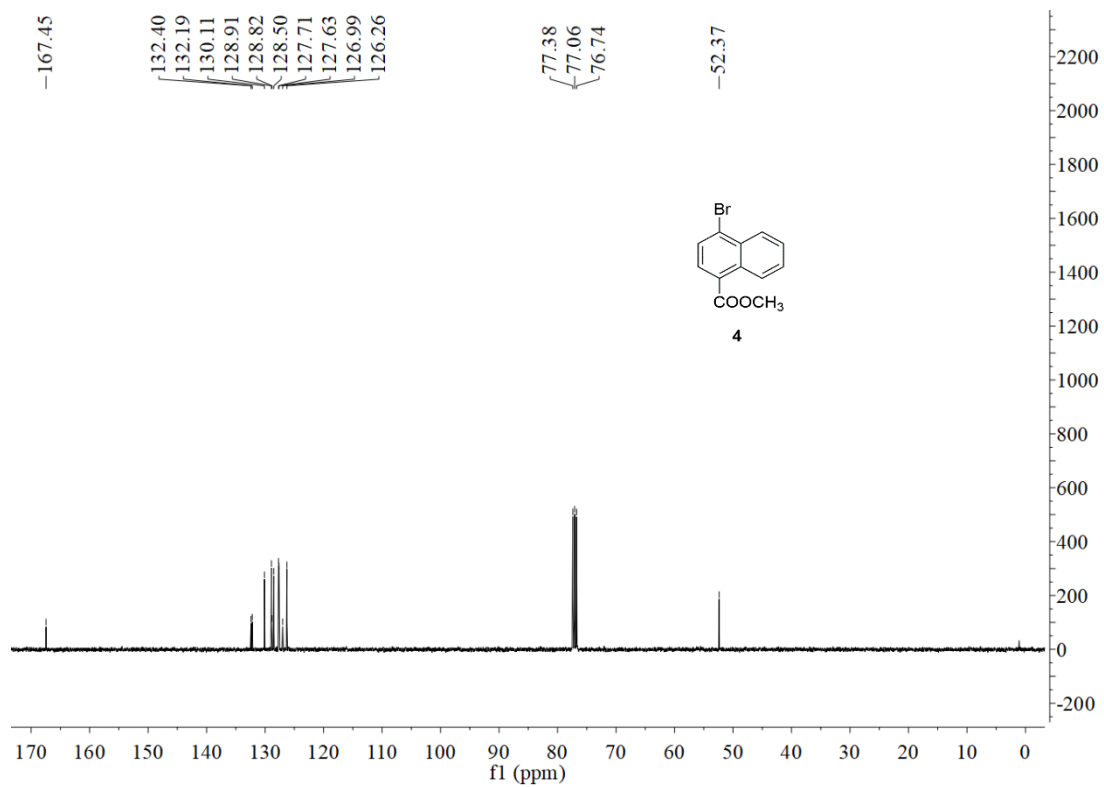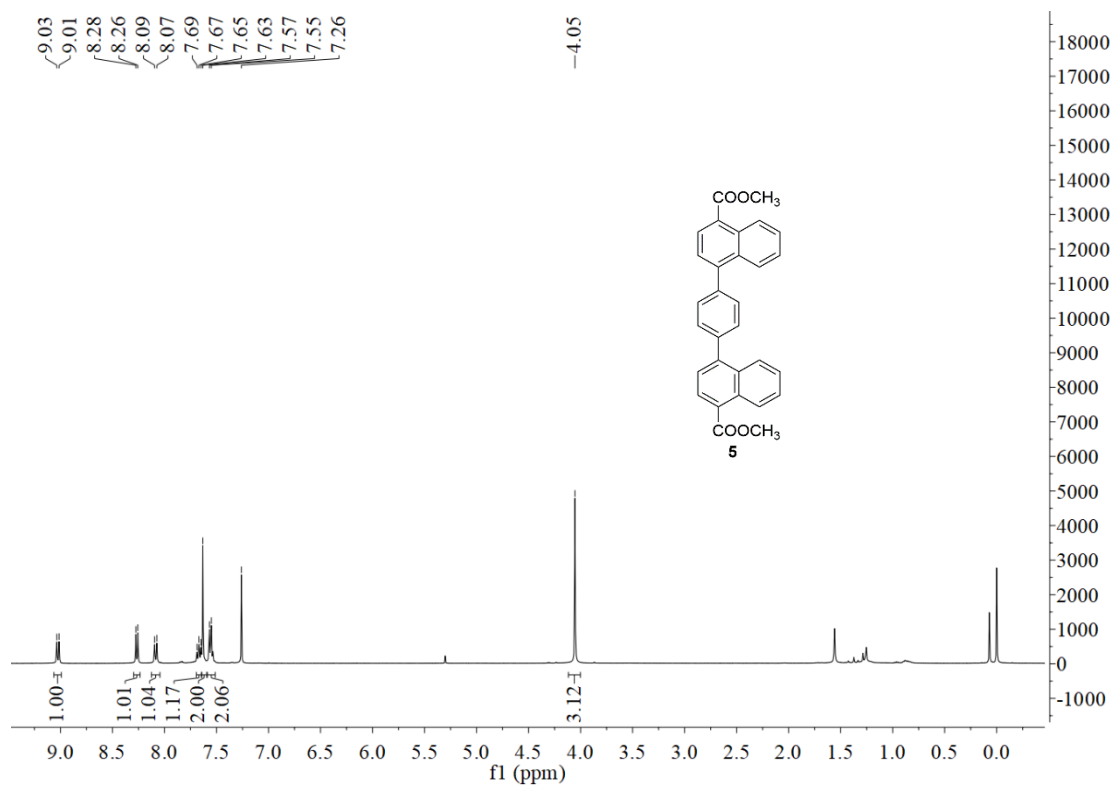

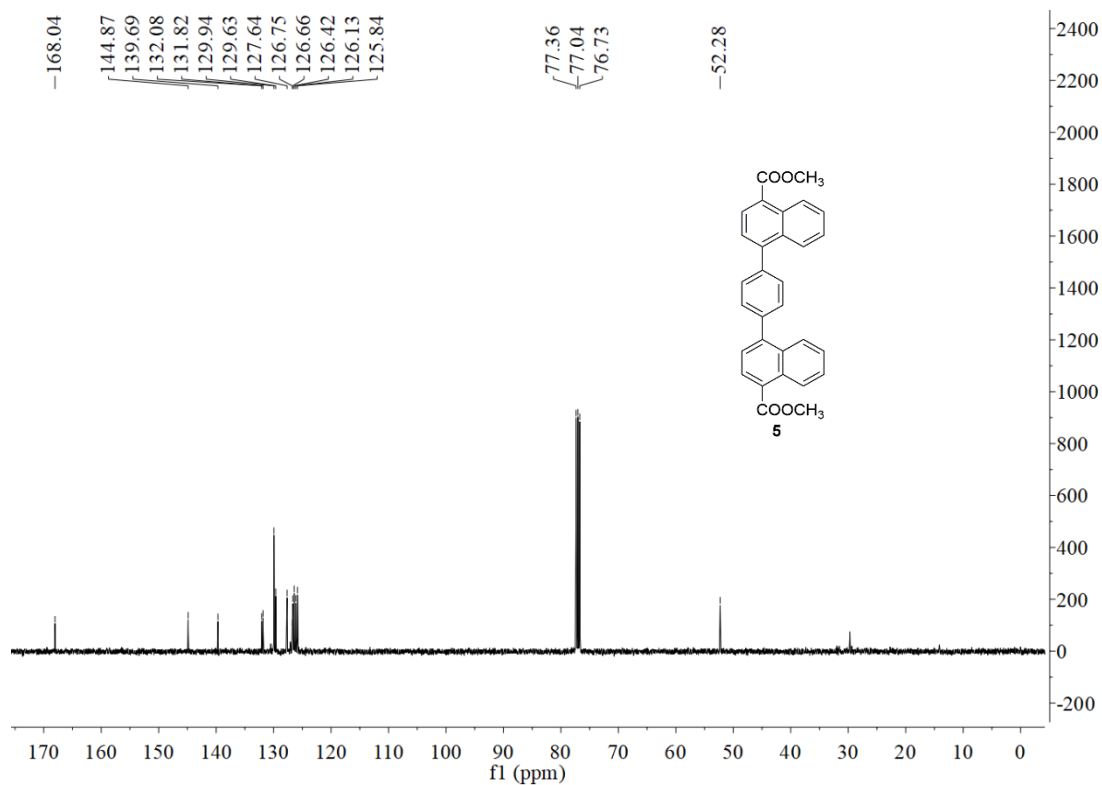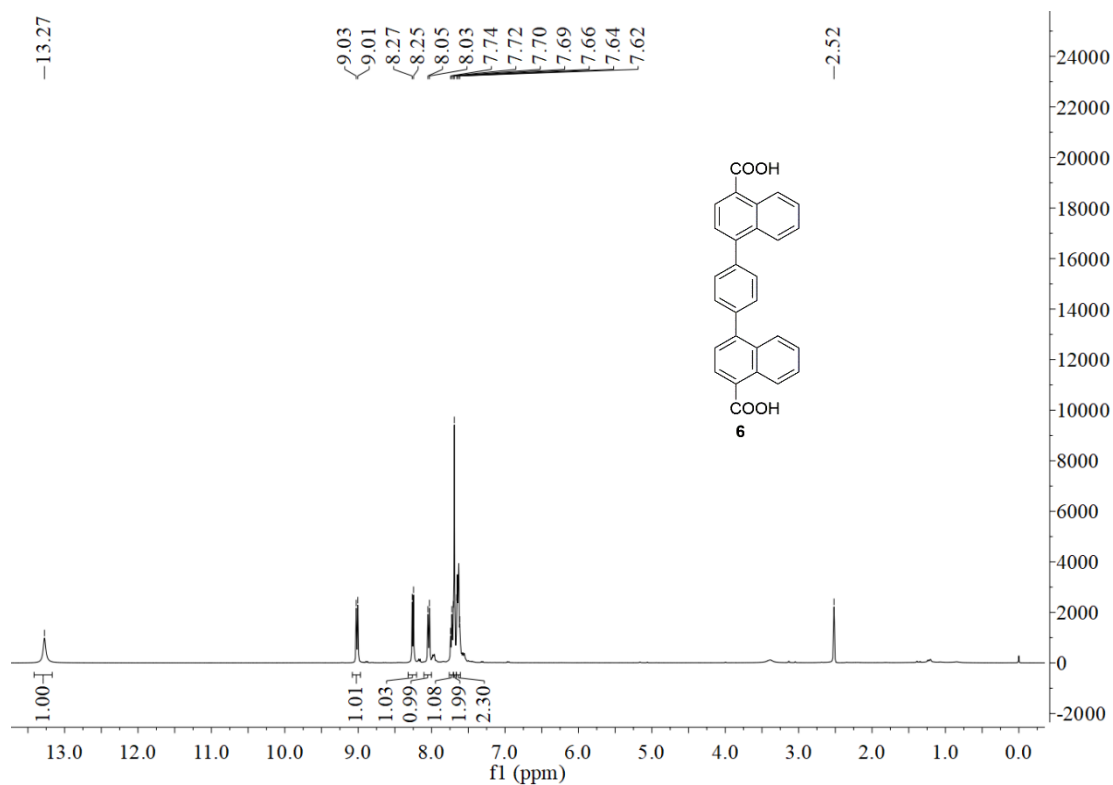

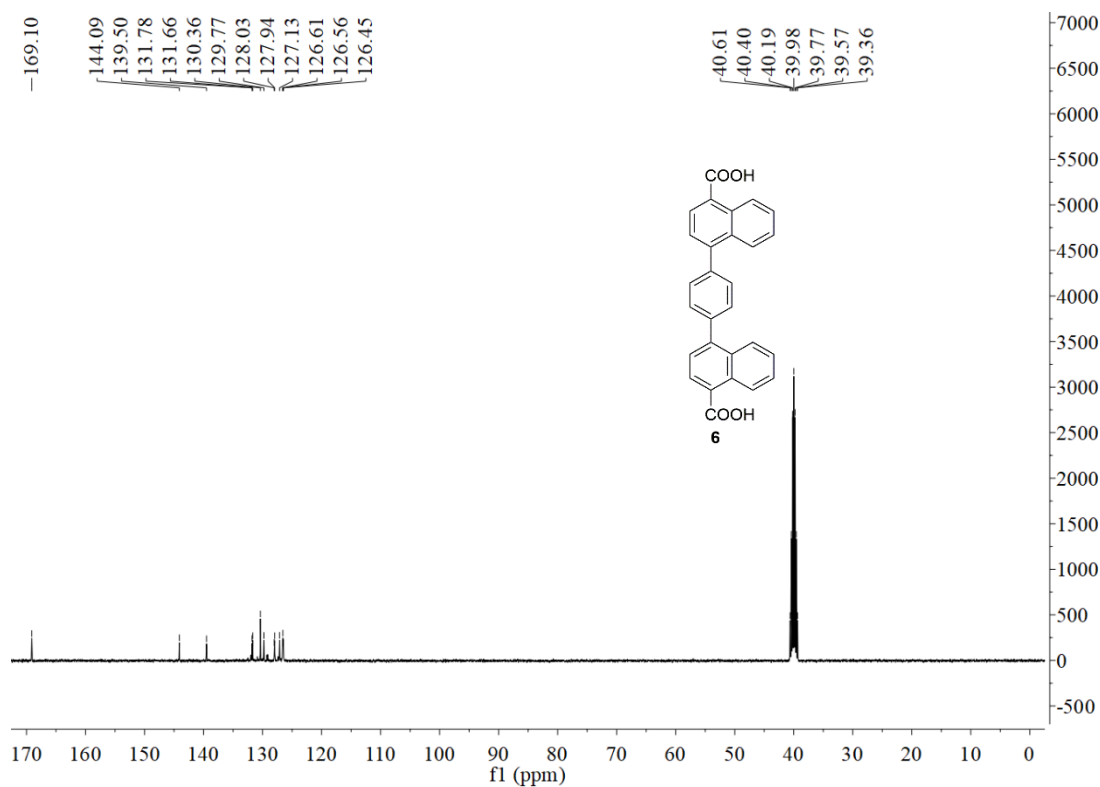

**Table 2 Crystal data and structure refinement for ligand.**

|                                    |                                                               |
|------------------------------------|---------------------------------------------------------------|
| Identification code                | Ligand                                                        |
| Empirical formula                  | C <sub>38</sub> H <sub>36</sub> N <sub>2</sub> O <sub>6</sub> |
| Formula weight                     | 616.69                                                        |
| Temperature/K                      | 113.15                                                        |
| Crystal system                     | monoclinic                                                    |
| Space group                        | C2/c                                                          |
| a/Å                                | 23.369(5)                                                     |
| b/Å                                | 7.7632(16)                                                    |
| c/Å                                | 17.150(3)                                                     |
| α/°                                | 90                                                            |
| β/°                                | 90.52(3)                                                      |
| γ/°                                | 90                                                            |
| Volume/Å <sup>3</sup>              | 3111.1(11)                                                    |
| Z                                  | 4                                                             |
| ρ <sub>calc</sub> /cm <sup>3</sup> | 1.317                                                         |
| μ/mm <sup>-1</sup>                 | 0.089                                                         |
| F(000)                             | 1304.0                                                        |
| Crystal size/mm <sup>3</sup>       | 0.2 × 0.18 × 0.12                                             |
| Radiation                          | MoKα (λ = 0.71073)                                            |
| 2θ range for data collection/°     | 3.486 to 55.752                                               |
| Index ranges                       | -30 ≤ h ≤ 30, -9 ≤ k ≤ 10, -16 ≤ l ≤ 22                       |

|                                                |                                                                  |
|------------------------------------------------|------------------------------------------------------------------|
| Reflections collected                          | 15041                                                            |
| Independent reflections                        | 3708 [ $R_{\text{int}} = 0.0698$ , $R_{\text{sigma}} = 0.0582$ ] |
| Data/restraints/parameters                     | 3708/0/220                                                       |
| Goodness-of-fit on $F^2$                       | 1.087                                                            |
| Final R indexes [ $I \geq 2\sigma(I)$ ]        | $R_1 = 0.0630$ , $wR_2 = 0.1336$                                 |
| Final R indexes [all data]                     | $R_1 = 0.0927$ , $wR_2 = 0.1499$                                 |
| Largest diff. peak/hole / $e \text{ \AA}^{-3}$ | 0.24/-0.23                                                       |

**Table 3 Crystal data and structure refinement for Cu-MOF.**

|                                                |                                                                    |
|------------------------------------------------|--------------------------------------------------------------------|
| Identification code                            | <b>Cu-MOF</b>                                                      |
| Empirical formula                              | $\text{C}_{34}\text{H}_{30}\text{CuN}_2\text{O}_6$                 |
| Formula weight                                 | 626.14                                                             |
| Temperature/K                                  | 113.1500                                                           |
| Crystal system                                 | triclinic                                                          |
| Space group                                    | P-1                                                                |
| a/ $\text{\AA}$                                | 10.311(2)                                                          |
| b/ $\text{\AA}$                                | 12.371(3)                                                          |
| c/ $\text{\AA}$                                | 14.638(3)                                                          |
| $\alpha/^\circ$                                | 88.89(3)                                                           |
| $\beta/^\circ$                                 | 88.16(3)                                                           |
| $\gamma/^\circ$                                | 67.68(3)                                                           |
| Volume/ $\text{\AA}^3$                         | 1726.3(7)                                                          |
| Z                                              | 2                                                                  |
| $\rho_{\text{calc}}/\text{g cm}^{-3}$          | 1.205                                                              |
| $\mu/\text{mm}^{-1}$                           | 0.675                                                              |
| F(000)                                         | 650.0                                                              |
| Crystal size/ $\text{mm}^3$                    | $0.2 \times 0.18 \times 0.12$                                      |
| Radiation                                      | $\text{MoK}\alpha$ ( $\lambda = 0.71073$ )                         |
| $2\Theta$ range for data collection/ $^\circ$  | 3.558 to 49.998                                                    |
| Index ranges                                   | $-12 \leq h \leq 12$ , $-14 \leq k \leq 14$ , $-17 \leq l \leq 17$ |
| Reflections collected                          | 16694                                                              |
| Independent reflections                        | 6078 [ $R_{\text{int}} = 0.0644$ , $R_{\text{sigma}} = 0.0809$ ]   |
| Data/restraints/parameters                     | 6078/1061/583                                                      |
| Goodness-of-fit on $F^2$                       | 1.079                                                              |
| Final R indexes [ $I \geq 2\sigma(I)$ ]        | $R_1 = 0.0933$ , $wR_2 = 0.2510$                                   |
| Final R indexes [all data]                     | $R_1 = 0.1097$ , $wR_2 = 0.2671$                                   |
| Largest diff. peak/hole / $e \text{ \AA}^{-3}$ | 1.12/-0.75                                                         |

**Table 4 Bond Lengths for Cu-MOF.**

| Atom | Atom             | Length/Å   | Atom | Atom             | Length/Å  |
|------|------------------|------------|------|------------------|-----------|
| Cu1  | Cu1 <sup>1</sup> | 2.6328(15) | C30  | C29              | 1.3900    |
| Cu1  | O1               | 1.958(4)   | C29  | C28              | 1.3900    |
| Cu1  | O2 <sup>1</sup>  | 1.972(4)   | C29  | C32              | 1.530(9)  |
| Cu1  | O3               | 2.02(2)    | C9   | C10              | 1.371(10) |
| Cu1  | O7               | 2.142(5)   | C9   | C12              | 1.492(9)  |
| O1   | C1               | 1.245(8)   | C10  | C11              | 1.396(9)  |
| O2   | C1               | 1.261(8)   | C12  | C13              | 1.404(10) |
| O3   | C15              | 1.30(2)    | C12  | C14              | 1.379(10) |
| O4   | C15              | 1.30(3)    | C13  | C14 <sup>2</sup> | 1.396(10) |
| O5   | C42              | 1.33(3)    | C15  | C16              | 1.51(2)   |
| O6   | C42              | 1.19(2)    | C16  | C17              | 1.3900    |
| O7   | C29A             | 1.247(17)  | C16  | C25              | 1.3900    |
| O7   | C46              | 1.270(17)  | C17  | C18              | 1.3900    |
| N1   | C28A             | 1.466(13)  | C18  | C19              | 1.3900    |
| N1   | C46              | 1.443(13)  | C19  | C20              | 1.3900    |
| N1   | C47              | 1.480(13)  | C20  | C25              | 1.3900    |
| N1A  | C29A             | 1.448(13)  | C20  | C21              | 1.3900    |
| N1A  | C30A             | 1.469(13)  | C25  | C24              | 1.3900    |
| N1A  | C31A             | 1.463(13)  | C24  | C23              | 1.3900    |
| C1   | C2               | 1.515(8)   | C23  | C22              | 1.3900    |
| C2   | C3               | 1.496(11)  | C22  | C21              | 1.3900    |
| C2   | C3A              | 1.453(12)  | C32  | C33              | 1.3900    |
| C2   | C11              | 1.350(9)   | C32  | C37              | 1.3900    |
| C5   | C4               | 1.3900     | C33  | C34              | 1.3900    |
| C5   | C6               | 1.3900     | C34  | C35              | 1.3900    |
| C4   | C3               | 1.3900     | C35  | C36              | 1.3900    |
| C3   | C27              | 1.3900     | C35  | C42              | 1.58(3)   |
| C27  | C7               | 1.3900     | C36  | C37              | 1.3900    |
| C27  | C9               | 1.518(12)  | C36  | C41              | 1.3900    |
| C7   | C6               | 1.3900     | C37  | C38              | 1.3900    |
| C5A  | C6A              | 1.3900     | C38  | C39              | 1.3900    |
| C5A  | C4A              | 1.3900     | C39  | C40              | 1.3900    |
| C6A  | C7A              | 1.3900     | C40  | C41              | 1.3900    |
| C7A  | C8A              | 1.3900     | O9   | C43              | 1.214(17) |
| C8A  | C3A              | 1.3900     | N3   | C43              | 1.466(13) |
| C8A  | C9               | 1.388(12)  | N3   | C44              | 1.458(13) |
| C3A  | C4A              | 1.3900     | N3   | C45              | 1.450(13) |
| C8   | C26              | 1.3900     | O10  | C48              | 1.152(17) |



**Table 4 Bond Lengths for Cu-MOF.**

| Atom | Atom | Length/Å  | Atom | Atom | Length/Å  |
|------|------|-----------|------|------|-----------|
| C8   | C28  | 1.3900    | N2   | C48  | 1.465(13) |
| C26  | C31  | 1.3900    | N2   | C49  | 1.471(13) |
| C26  | C19  | 1.541(10) | N2   | C50  | 1.446(13) |
| C31  | C30  | 1.3900    |      |      |           |

<sup>1</sup>1-X,1-Y,-Z; <sup>2</sup>2-X,-Y,1-Z

**Table 5 Bond Angles for Cu-MOF.**

| Atom            | Atom | Atom             | Angle/°    | Atom             | Atom | Atom             | Angle/°   |
|-----------------|------|------------------|------------|------------------|------|------------------|-----------|
| O1              | Cu1  | Cu1 <sup>1</sup> | 84.54(14)  | C10              | C9   | C12              | 118.2(6)  |
| O1              | Cu1  | O2 <sup>1</sup>  | 168.37(19) | C12              | C9   | C27              | 122.5(8)  |
| O1              | Cu1  | O3               | 83.3(6)    | C9               | C10  | C11              | 121.2(7)  |
| O1              | Cu1  | O7               | 93.3(2)    | C2               | C11  | C10              | 122.1(7)  |
| O2 <sup>1</sup> | Cu1  | Cu1 <sup>1</sup> | 83.85(14)  | C13              | C12  | C9               | 121.5(7)  |
| O2 <sup>1</sup> | Cu1  | O3               | 95.1(6)    | C14              | C12  | C9               | 120.6(6)  |
| O2 <sup>1</sup> | Cu1  | O7               | 98.3(2)    | C14              | C12  | C13              | 117.9(6)  |
| O3              | Cu1  | Cu1 <sup>1</sup> | 85.0(6)    | C14 <sup>2</sup> | C13  | C12              | 120.1(7)  |
| O3              | Cu1  | O7               | 97.3(6)    | C12              | C14  | C13 <sup>2</sup> | 122.0(7)  |
| O7              | Cu1  | Cu1 <sup>1</sup> | 176.65(18) | O3               | C15  | C16              | 114.9(16) |
| C1              | O1   | Cu1              | 122.9(4)   | O4               | C15  | O3               | 125(3)    |
| C1              | O2   | Cu1 <sup>1</sup> | 122.5(4)   | O4               | C15  | C16              | 120.2(18) |
| C15             | O3   | Cu1              | 120.8(19)  | C17              | C16  | C15              | 114.5(6)  |
| C29A            | O7   | Cu1              | 116.6(13)  | C17              | C16  | C25              | 120.0     |
| C46             | O7   | Cu1              | 112.7(13)  | C25              | C16  | C15              | 125.5(6)  |
| C28A            | N1   | C47              | 115.0(16)  | C16              | C17  | C18              | 120.0     |
| C46             | N1   | C28A             | 132.4(17)  | C19              | C18  | C17              | 120.0     |
| C46             | N1   | C47              | 112.6(16)  | C18              | C19  | C26              | 118.7(4)  |
| C29A            | N1A  | C30A             | 118.1(17)  | C18              | C19  | C20              | 120.0     |
| C29A            | N1A  | C31A             | 114.0(17)  | C20              | C19  | C26              | 121.0(4)  |
| C31A            | N1A  | C30A             | 127.8(18)  | C19              | C20  | C25              | 120.0     |
| O1              | C1   | O2               | 126.2(5)   | C19              | C20  | C21              | 120.0     |
| O1              | C1   | C2               | 119.0(6)   | C25              | C20  | C21              | 120.0     |
| O2              | C1   | C2               | 114.8(6)   | C20              | C25  | C16              | 120.0     |
| C3              | C2   | C1               | 121.3(7)   | C24              | C25  | C16              | 120.0     |
| C3A             | C2   | C1               | 124.0(8)   | C24              | C25  | C20              | 120.0     |
| C11             | C2   | C1               | 118.4(6)   | C23              | C24  | C25              | 120.0     |
| C11             | C2   | C3               | 119.3(8)   | C24              | C23  | C22              | 120.0     |

**Table 5 Bond Angles for Cu-MOF.**

| Atom | Atom | Atom | Angle/°   | Atom | Atom | Atom | Angle/°   |
|------|------|------|-----------|------|------|------|-----------|
| C11  | C2   | C3A  | 116.4(8)  | C21  | C22  | C23  | 120.0     |
| C4   | C5   | C6   | 120.0     | C22  | C21  | C20  | 120.0     |
| C5   | C4   | C3   | 120.0     | O7   | C29A | N1A  | 114.7(17) |
| C4   | C3   | C2   | 121.5(9)  | C33  | C32  | C29  | 117.5(5)  |
| C4   | C3   | C27  | 120.0     | C33  | C32  | C37  | 120.0     |
| C27  | C3   | C2   | 118.4(9)  | C37  | C32  | C29  | 122.3(5)  |
| C3   | C27  | C9   | 118.4(9)  | C34  | C33  | C32  | 120.0     |
| C7   | C27  | C3   | 120.0     | C35  | C34  | C33  | 120.0     |
| C7   | C27  | C9   | 121.6(9)  | C34  | C35  | C36  | 120.0     |
| C27  | C7   | C6   | 120.0     | C34  | C35  | C42  | 115.5(6)  |
| C7   | C6   | C5   | 120.0     | C36  | C35  | C42  | 123.3(6)  |
| C6A  | C5A  | C4A  | 120.0     | C35  | C36  | C37  | 120.0     |
| C7A  | C6A  | C5A  | 120.0     | C35  | C36  | C41  | 120.0     |
| C6A  | C7A  | C8A  | 120.0     | C37  | C36  | C41  | 120.0     |
| C7A  | C8A  | C3A  | 120.0     | C36  | C37  | C32  | 120.0     |
| C9   | C8A  | C7A  | 118.6(10) | C38  | C37  | C32  | 120.0     |
| C9   | C8A  | C3A  | 121.2(10) | C38  | C37  | C36  | 120.0     |
| C8A  | C3A  | C2   | 119.5(9)  | C37  | C38  | C39  | 120.0     |
| C4A  | C3A  | C2   | 120.1(9)  | C38  | C39  | C40  | 120.0     |
| C4A  | C3A  | C8A  | 120.0     | C41  | C40  | C39  | 120.0     |
| C3A  | C4A  | C5A  | 120.0     | C40  | C41  | C36  | 120.0     |
| C26  | C8   | C28  | 120.0     | O5   | C42  | C35  | 112.7(18) |
| C8   | C26  | C31  | 120.0     | O6   | C42  | O5   | 125(3)    |
| C8   | C26  | C19  | 120.3(5)  | O6   | C42  | C35  | 122(2)    |
| C31  | C26  | C19  | 119.7(5)  | O7   | C46  | N1   | 127(2)    |
| C30  | C31  | C26  | 120.0     | C44  | N3   | C43  | 113.4(16) |
| C31  | C30  | C29  | 120.0     | C45  | N3   | C43  | 118.5(16) |
| C30  | C29  | C28  | 120.0     | C45  | N3   | C44  | 128.1(17) |
| C30  | C29  | C32  | 121.1(5)  | O9   | C43  | N3   | 118.8(19) |
| C28  | C29  | C32  | 118.6(5)  | C48  | N2   | C49  | 117.0(18) |
| C29  | C28  | C8   | 120.0     | C50  | N2   | C48  | 120.7(18) |
| C8A  | C9   | C12  | 123.1(8)  | C50  | N2   | C49  | 122(2)    |
| C10  | C9   | C27  | 118.6(8)  | O10  | C48  | N2   | 121(2)    |
| C10  | C9   | C8A  | 117.6(8)  |      |      |      |           |

<sup>1</sup>1-X,1-Y,-Z; <sup>2</sup>2-X,-Y,1-Z

- 1 O. V. Dolomanov, L. J. Bourhis, R. J. Gildea, J. A. K. Howard and H. J. Puschmann, *Appl. Cryst.*, 2009, **2**, 339.
- 2 G. M. Sheldrick, University of Göttingen, *Germany*, 1997.
- 3 S. Øien-Ødegaard, B. Bouchevreau, K. Hylland, L. Wu, R. Blom, C. Grande, U. Olsbye, M. Tilset and K. P. Lillerud, *Inorg. Chem.*, 2016, **55**, 1986.
